# Supplementary material for: Drowning in the Eastern Mediterranean region: a systematic literature review of the epidemiology, risk factors and strategies for prevention
Source: Springer Nature journal article supplement (doi:10.1186/s12889-022-13778-6), 2022-08-03
Supplement: MOESM1 [file 23332552]

## Supplementary Tables

Table S1: Search Strategy

| <b>Database</b> | <b>Search strategy</b>        | <b>Result</b> |
|-----------------|-------------------------------|---------------|
| Embase          | 1 drown*.mp.                  | 260           |
|                 | 2 submers*.mp.                |               |
|                 | 3 immers*.mp.                 |               |
|                 | 4 2 or 3                      |               |
|                 | 5 injury.mp or injury/        |               |
|                 | 6 4 and 5                     |               |
|                 | 7 swim*.mp.                   |               |
|                 | 8 education/ or education.mp. |               |
|                 | 9 7 and 8                     |               |
|                 | 10 1 o 6 or 9                 |               |
|                 | 11 Afghan*.mp.                |               |
|                 | 12 Bahrain*.mp.               |               |
|                 | 13 Djibouti*.mp.              |               |
|                 | 14 Egypt*.mp.                 |               |
|                 | 15 Iran*.mp.                  |               |
|                 | 16 Iraq*.mp.                  |               |
|                 | 17 Jordan*.mp.                |               |

18 Kuwait\*.mp.

19 Leban\*.mp.

20 Libya\*.mp.

21 Moroc\*.mp.

22 Palestin\*.mp.

23 Oman\*.mp.

24 Pakistan\*.mp.

25 Qatar\*.mp.

26 Saudi Arabia.mp. or Saudi Arabia/

27 Somalia\*.mp.

28 Sudan\*.mp.

29 Syria\*.mp.

30 Tunisia\*.mp.

31 United Arab Emirates\*.mp.

32Yemen\*.mp.

33Middle East\*.mp.

34 Mediterranean\*.mp.

35 11 or 12 or 13 or 14 or 15 or 16 or 17 or 18 or 19 or 20 or 21 or 22 or 23 or 24 or 25 or 26 or 27 or 28 or 29 or 30 or 31 or 32 or 33 or 34

36 10 and 35

|                |                                                                                                                                                                                                                                                                                                                                                                                                                                                                                                                    |                         |
|----------------|--------------------------------------------------------------------------------------------------------------------------------------------------------------------------------------------------------------------------------------------------------------------------------------------------------------------------------------------------------------------------------------------------------------------------------------------------------------------------------------------------------------------|-------------------------|
| PubMed         | <p>#1 Search: drown*</p> <p>#2 Search: immers* OR submers* AND injury</p> <p>#3 Search: swim* AND education</p> <p>#4 Search: Afghan* OR Bahrain* OR Djibouti* OR Egypt* OR Iran* OR Iraq* OR Jordan* OR Kuwait* OR Leban* OR Libya* OR Moroc* OR Palestin* OR Oman* OR Pakistan* OR Qatar* OR "Saudi Arabia*" OR Somalia* OR Sudan* OR "Syrian Arab Republic*" OR Tunisia* OR "United Arab Emirates*" OR Yemen* OR Middle East [Mesh]" OR Mediterranean*</p> <p>#5 Search: (#1 OR #2 OR #3 AND #4)</p>            | 416                     |
| Scopus         | <p>TITLE-ABS-KEY(Drown* OR ((immers* OR submers*) AND injury) AND ("Middle East*" OR Afghan* OR Bahrain* OR Djibouti* OR Egypt* OR Iraq* OR Iran* OR Jordan* OR Kuwait* OR Leban* OR Libya* OR Moroc* OR Palestin* OR Oman* OR Pakistan* OR Qatar* OR "Saudi Arabia*" OR Somalia* OR Sudan* OR Syria* OR Tunisia* OR "United Arab Emirates*" OR Yemen* OR Mediterranean*)) AND ( LIMIT-TO ( LANGUAGE,"English" ) ) AND ( LIMIT-TO ( DOCTYPE,"ar" ) OR LIMIT-TO ( DOCTYPE,"re" ) OR LIMIT-TO ( DOCTYPE,"ch" ) )</p> | 536                     |
| SportsDiscus   | <p>drown* OR ((immers* OR submers*) AND injury) OR (swim* AND education)</p> <p>AND</p> <p>Afghan* OR Bahrain* OR Djibouti* OR Egypt* OR Iran* OR Iraq* OR Jordan* OR Kuwait* OR Leban* OR Libya* OR Moroc* OR Palestin* OR Oman* OR Pakistan* OR Qatar* OR "Saudi Arabia*" OR Somalia* OR Sudan* OR Syria* OR Tunisia* OR "United Arab Emirates*" OR Yemen* OR "Middle East*" OR Mediterranean*</p>                                                                                                               | 120                     |
| Web of Science | <p>Drown* OR ((immers* OR submers*) AND injury) OR (swim* and education)</p> <p>AND</p> <p>"Middle East*" OR Mediterranean* OR Afghan* OR Bahrain* OR Djibouti* OR Egypt* OR Iraq* OR Iran* OR Jordan* OR Kuwait* OR Leban* OR Libya* OR Moroc* OR Palestin* OR Oman* OR Pakistan* OR Qatar* OR "Saudi Arabia*" OR Somalia* OR Sudan* OR Syria* OR Tunisia* OR "United Arab Emirates*" OR Yemen*</p>                                                                                                               | 470                     |
| Google Scholar | <p>drown* OR ((immers* OR submers*) AND injury) OR (swim* AND education) AND Afghan* OR Bahrain* OR Djibouti* OR Egypt* OR Iran* OR Iraq* OR Jordan* OR Kuwait* OR Leban* OR Libya* OR Moroc* OR Palestin* OR Oman* OR Pakistan* OR Qatar* OR "Saudi Arabia*" OR Somalia* OR Sudan* OR Syria* OR Tunisia* OR "United Arab Emirates*" OR Yemen* OR "Middle East*" OR Mediterranean*</p>                                                                                                                             | 4 (24 pages of results) |



Table S2: Description of risk/protective factors, their measure of significance and coding methodology

| Author, year, reference  | Country      | Study population | Description of risk/protective factor | Measure of significance                                                                                                                                                  | Coded risk/protective factor      |
|--------------------------|--------------|------------------|---------------------------------------|--------------------------------------------------------------------------------------------------------------------------------------------------------------------------|-----------------------------------|
| Al Fifi et al, 2011 (1)  | Saudi Arabia | 0-13 years       | Winter and Autumn                     | Survival significantly worse (p=0.02)                                                                                                                                    | Seasonality                       |
|                          |              |                  | Washing containers                    | Outcome worse than for those who drowned in pools (p=0.04)                                                                                                               | Washing containers                |
|                          |              |                  | Absence of adult supervision          | All fatal drownings were unsupervised by adults (p=0.013)                                                                                                                | Adult supervision                 |
|                          |              |                  | Longer submersion duration            | 12 minutes median submersion time for fatal vs 3 minutes for non-fatal) (p=0.001)                                                                                        | Submersion time                   |
| Alkhalaf et al, 2021 (2) | Saudi Arabia | 0-14 years       | Delay in initiating resuscitation     | A significant association was found between delay in initiating resuscitation and an unfavourable outcome (p<0.01)                                                       | Delay in initiating resuscitation |
|                          |              |                  | Submersion time *                     | A shorter submersion time was significantly associated with a favourable outcome (non-fatal drowning with no neurological damage) (3.5 minutes vs 12.5 minutes) (p<0.01) | Submersion time                   |
|                          |              |                  | High GCS upon admission *             | Complete recovery was associated with high GCS upon admission (p<0.01)                                                                                                   | GCS                               |
|                          |              |                  | Decreased length of stay *            | Complete recovery was associated with decreased length of hospital stay (p<0.01)                                                                                         | Length of hospital stay           |
|                          |              |                  | High GCS upon end of care *           | Complete recovery was associated with high GCS upon the end of care (p<0.01)                                                                                             | GCS                               |

|                                    |              |                     |                                                        |                                                                                                                                           |                        |
|------------------------------------|--------------|---------------------|--------------------------------------------------------|-------------------------------------------------------------------------------------------------------------------------------------------|------------------------|
| Al-Mofadda et al, 2001 (3)         | Saudi Arabia | 1-13 years of age   | Submersion time                                        | Submersion time >5 minutes predicted fatal outcome (p=0.003)                                                                              | Submersion time        |
|                                    |              |                     | Emergency room documentation of absence of vital signs | Emergency room documentation of absence of vital signs significantly associated with brain death or severe neurological disease (p=0.006) | Absence of vital signs |
|                                    |              |                     | GCS ≤4                                                 | GCS ≤4 associated with brain death or severe neurological disease in 94.1% of cases (p=0.006)                                             | GCS                    |
|                                    |              |                     | Arterial pH of ≤7                                      | Arterial pH of ≤7 associated with brain death or severe neurological disease in 94.1% of cases (p=0.006)                                  | pH level               |
|                                    |              |                     | Blood sugar of ≥10mmol/L                               | Blood sugar of ≥10mmol/L associated with brain death or severe neurological disease in 80.0%% of cases (p=0.001)                          | Blood sugar level      |
| Almuneef et al, 2021 (4)           | Saudi Arabia | Children 0-17 years | Age <5 years                                           | Significantly more drowning deaths among children ≤5 years than children >5 years (p<0.01)                                                | Age                    |
|                                    |              |                     | Male gender                                            | Significantly more drowning deaths among children of male gender (p<0.01)                                                                 | Sex                    |
| Al-Thani et al, 2018 (5)           | Qatar        | Children 1-5 years  | Male gender                                            | Males drowned at a rate 2.75 times higher than females (RR=2.75 [95%CI: 1.16-6.50]) (p=0.02)                                              | Sex                    |
| Davoudi-Kiakalayeh et al, 2011 (6) | Iran         | All age             | Male gender                                            | Males were 3.28 times more likely to drown than females                                                                                   | Sex                    |
| Davoudi-Kiakalayeh et al, 2013 (7) | Iran         | All age             | Male gender                                            | Males were 10.9 times more likely to drown than females in the resident population in 2008-09                                             | Sex                    |

|                           |              |                                                |                                                                        |                                                                                                                                                                                                   |                                      |
|---------------------------|--------------|------------------------------------------------|------------------------------------------------------------------------|---------------------------------------------------------------------------------------------------------------------------------------------------------------------------------------------------|--------------------------------------|
| Jan et al, 2000 (8)       | Saudi Arabia | Parents of infants                             | Mother with helper or older children leaving infant unattended in bath | Mothers with a helper or older children were more likely to report leaving their infant unattended in the bathtub when compared to those who never left their infant unattended at home (p=0.002) | Mother with helper or older children |
| Liu et al, 2021 (9)       | Bahrain      | Children 0-13 years                            | Age 1-4 years                                                          | Drowning cases were significantly more likely to occur among the 1-4 years age group (p<0.001)                                                                                                    | Age                                  |
| Mosayebi et al, 2011 (10) | Iran         | Children 0-15 years                            | Male                                                                   | Males had a 3.5 times higher odds ratio of fatal drowning than non-fatal drowning when compared to females (OR=3.5 [95%CI:0.38-31.5])                                                             | Sex                                  |
|                           |              |                                                | Absent vital signs                                                     | Significantly associated with mortality (p<0.001)                                                                                                                                                 | Absence of vital signs               |
|                           |              |                                                | GCS<5                                                                  | Significantly associated with mortality (p<0.001)                                                                                                                                                 | GCS                                  |
|                           |              |                                                | Temperature ≥36 degrees *                                              | Positively correlated with recovery (p=0.003)                                                                                                                                                     | Body temperature                     |
|                           |              |                                                | pH <7.2                                                                | Acidosis associated with unfavourable outcome                                                                                                                                                     | pH level                             |
| Shahbazi et al, 2020 (11) | Iran         | All age                                        | Male sex                                                               | Males were more likely to drown than females (p=0.03)                                                                                                                                             | Sex                                  |
| Vahhab et al, 2019 (12)   | Iran         | Children and adolescents up to 18 years of age | Age                                                                    | Children aged 1-4 years more at risk of drowning                                                                                                                                                  | Age                                  |
|                           |              |                                                | Male sex                                                               | Males significantly more at risk than females (p<0.001)                                                                                                                                           | Sex                                  |
|                           |              |                                                | Accidental intent                                                      | Drowning was more likely to be of accidental intent than due to suicide or homicide (p<0.001)                                                                                                     | Accidental intent                    |
|                           |              |                                                | Death at the scene of the incident                                     | Location of death was significantly more likely to be at the scene for drowning, than during transfer to                                                                                          | Death at scene                       |

|                            |      |         |                                       |                                                                                                           |                       |
|----------------------------|------|---------|---------------------------------------|-----------------------------------------------------------------------------------------------------------|-----------------------|
| Zolala et al, 2012<br>(13) | Iran | All age |                                       | hospital, at hospital or after discharge from hospital<br>(p<0.001)                                       |                       |
|                            |      |         | Females aged 14 years or less         | Females aged 14 years or less were significantly more likely to drown than males of the same age (p=0.03) | Sex<br>Age            |
|                            |      |         | Tourists                              | Tourists were significantly more likely to drown than local residents (p<0.001)                           | Resident status       |
|                            |      |         | Local residents                       | Drowning among local residents was more likely to be fatal than drowning in tourists (p<0.001)            | Resident status       |
|                            |      |         | Tourist drowning in the sea           | Tourists were significantly more likely than residents to drown in the Caspian Sea (p<0.001)              | Resident status       |
|                            |      |         | Non-designated areas (un-lifeguarded) | Drowning was more likely to be fatal in non-designated areas (p<0.001)                                    | Non-lifeguarded areas |

\* denotes protective factor; GCS-Glasgow Coma Scale



Table S3: Prevention strategies as described in included studies and coding methodology used, Eastern Mediterranean Region

| Author, Year, Reference            | Study location | Description of prevention strategy                                                                                                                 | Coded prevention strategy               |
|------------------------------------|----------------|----------------------------------------------------------------------------------------------------------------------------------------------------|-----------------------------------------|
| Abdullah et al, 2013 (14)          | Jordan         | Establishing a mobile health station on the beach to deal with emergency cases promptly and effectively                                            | CPR and first aid                       |
|                                    |                | Advising people to swim in safe places and only where lifeguards are available (health messages were delivered via signs/signals placed on beach); | Signage                                 |
|                                    |                | Assess the safety of beaches and the possibility and efficacy of employing lifeguards                                                              | Beach safety assessment                 |
| AlAwadhi et al, 2018 (15)          | Bahrain        | Developing a national water safety strategy is necessary to decrease age-standardized unintentional drowning mortality rate in Bahrain.            | Developing a national water safety plan |
| Al-Fifi et al, 2011 (1)            | Saudi Arabia   | The media as well as the authority should play a major role in increasing the public awareness to minimize or prevent such a problem.              | Public education                        |
|                                    |                | To raise awareness of basic life-support measures (first aid) and the support of emergency medical services.                                       | CPR and first aid                       |
| Alkhalaf et al, 2021 (2)           | Saudi Arabia   | Prevention measures should focus on ensuring that children do not swim unsupervised.                                                               | Child supervision                       |
|                                    |                | There is a need to ensure early resuscitation of drowning victims by promoting life support courses and enforcing regulations around water.        | CPR and first aid                       |
| Davoudi-Kiakalayeh et al, 2011 (6) | Iran           | The high-risk population should be trained in basic swimming and rescue skills                                                                     | Swimming and water safety training      |

|                                     |      |                                                                                                                                                                                                                                                     |                                    |
|-------------------------------------|------|-----------------------------------------------------------------------------------------------------------------------------------------------------------------------------------------------------------------------------------------------------|------------------------------------|
|                                     |      | Many more rescue stations are needed in areas where swimming occurs.                                                                                                                                                                                | Lifeguard supervision              |
|                                     |      | Educational campaigns such as integrating public health messages into local television can be employed                                                                                                                                              | Public education                   |
| Davoudi-Kiakalayeh et al, 2013 (7)  | Iran | Modification of environmental change through, for example, the elimination of certain water reservoirs                                                                                                                                              | Restrict access to water           |
|                                     |      | Raising community awareness via information programmes for health care workers who employed to educate clients                                                                                                                                      | Public education                   |
|                                     |      | Training high risk populations in basic resuscitation techniques                                                                                                                                                                                    | CPR and first aid                  |
|                                     |      | Integration of public health messages into local television and radio news during the summer season                                                                                                                                                 | Public education                   |
|                                     |      | Extension of lifeguard services throughout the beach regions of the Caspian Sea                                                                                                                                                                     | Lifeguard supervision              |
|                                     |      | Expansion of the number and scale of rescue service stations in beach areas                                                                                                                                                                         | Lifeguard supervision              |
| Davoudi-Kiakalayeh et al, 2014 (16) | Iran | Basic swimming skills should be trained to children                                                                                                                                                                                                 | Swimming and water safety training |
|                                     |      | Additional rescue stations and lifeguarding are needed along the Caspian Sea Coastline (one lifeguard for every 500 meters)                                                                                                                         | Lifeguard supervision              |
|                                     |      | Integration of public health messages into local television such as the Darya program is necessary                                                                                                                                                  | Public education                   |
|                                     |      | Lake and water canal fencing may help to prevent drowning events in rural settings. The majority of the participants expected that some measures, especially the fencing of rivers and canal water way should be done by governmental organizations | Restrict access to water           |

|                             |                                       |                                                                                                                                                                                                                                                                                                                                 |                                                  |
|-----------------------------|---------------------------------------|---------------------------------------------------------------------------------------------------------------------------------------------------------------------------------------------------------------------------------------------------------------------------------------------------------------------------------|--------------------------------------------------|
| Habeeb et al, 2020 (17)     | Saudi Arabia                          | First Aid – describes parental knowledge of first aid for a non-responsive but breathing victim – 64.3% knew to lay the victim in a left lateral position. In a nonresponsive not breathing drowning victim, 90.5% knew to start chest compressions and mouth to mouth ventilation. 65.6% knew not to slap a victim on the back | CPR and first aid                                |
| Hammett et al, 2007 (18)    | Afghanistan and Iraq                  | Modifications to vehicles including restraint systems, battle lock modification to vehicle for passengers and rescuers,                                                                                                                                                                                                         | Vehicle modification                             |
|                             |                                       | Changes to operating procedures when on road near water                                                                                                                                                                                                                                                                         | Vehicle operation procedures                     |
|                             |                                       | Water egress procedure training                                                                                                                                                                                                                                                                                                 | Vehicle-related water safety training            |
| Kiakalayeh et al, 2008 (19) | Iran                                  | Should be trained in basic swimming and rescue skills                                                                                                                                                                                                                                                                           | Swimming and water safety training               |
|                             |                                       | Many more rescue stations are needed in areas where swimming occurs.                                                                                                                                                                                                                                                            | Lifeguard supervision                            |
| Liu et al, 2021 (9)         | Bahrain                               | Constant adult supervision                                                                                                                                                                                                                                                                                                      | Child supervision                                |
|                             |                                       | Personal flotation devices                                                                                                                                                                                                                                                                                                      | Personal flotation devices                       |
|                             |                                       | Swimming education for children over the age of 4                                                                                                                                                                                                                                                                               | Swimming and water safety training               |
|                             |                                       | Pool isolation fencing                                                                                                                                                                                                                                                                                                          | Restrict access to water                         |
| Mal et al, 2020 (20)        | Pakistan                              | Strict surveillance and employment of lifeguards at Karachi beaches during Summer                                                                                                                                                                                                                                               | Lifeguard supervision                            |
| Mavridou et al, 2014 (21)   | Egypt, Lebanon, Palestine and Tunisia | Spa regulations                                                                                                                                                                                                                                                                                                                 | Spa regulations                                  |
|                             |                                       | Multi-lingual lifeguards                                                                                                                                                                                                                                                                                                        | Lifeguard supervision (multi-lingual lifeguards) |
| Mlayeh et al, 2021 (22)     | Tunisia                               | Provision of supervision while walking to school for school aged children                                                                                                                                                                                                                                                       | Child supervision                                |

|                                |           |                                                                                                        |                                                    |
|--------------------------------|-----------|--------------------------------------------------------------------------------------------------------|----------------------------------------------------|
| Razzak et al, 2013 (23)        | Pakistan  | Reduce access to water storage systems                                                                 | Restrict access to water                           |
| Ruehsen et al, 1989 (24)       | Bahrain   | Resuscitation and first aid training should be compulsory for licensed boat owners                     | CPR and first aid                                  |
|                                |           | All hotels and public swimming areas which are presently unattended should be staffed with a lifeguard | Lifeguard supervision                              |
| Shaheen and Edwards, 2008 (25) | Palestine | Health education campaign that targeted parents, using media to highlight problem                      | Public education                                   |
| Shaikh, 2014 (26)              | Pakistan  | Female lifeguards to rescue drowning women                                                             | Lifeguard supervision (female lifeguards)          |
|                                |           | Police presence at beaches                                                                             | Lifeguard supervision (police presence at beaches) |
| Shaikh, 2016 (27)              | Pakistan  | Need to targeted health education campaigns, especially during summer months                           | Public education                                   |

CPR-Cardio Pulmonary Resuscitation

Table S4: Characteristics of included studies

| Author(s), Year, Reference    | Country      | Year(s) of study | Location | Urban/Rural/Both | Study population       | Drowning |     |    |        |   |     | Study Design                        | NHMRC Level of Evidence |
|-------------------------------|--------------|------------------|----------|------------------|------------------------|----------|-----|----|--------|---|-----|-------------------------------------|-------------------------|
|                               |              |                  |          |                  |                        | Outcome  |     |    | Intent |   |     |                                     |                         |
|                               |              |                  |          |                  |                        | F        | N-F | Un | U      | I | Unk |                                     |                         |
| Abdullah et al, 2013 (14)     | Jordan       | 2010             | S        | Urban            | No age restrictions    | ✓        |     |    |        | ✓ |     | Retrospective cross-sectional study | IV                      |
| Aghajani et al, 2019 (28)     | Iran         | 2009-2014        | N        | Both             | No age restrictions    | ✓        |     |    |        | ✓ | ✓   | Retrospective cross-sectional study | IV                      |
| Aghamohamadi et al, 2018 (29) | Iran         | 2006-2035        | N        | Both             | No age restrictions    | ✓        |     |    |        | ✓ |     | Retrospective cross-sectional study | IV                      |
| AlAwadhi et al, 2018 (15)     | Bahrain      | 2003-2015        | N        | Both             | No age restrictions    | ✓        |     |    |        | ✓ |     | Retrospective descriptive study     | IV                      |
| Al-Fifi et al, 2011 (1)       | Saudi Arabia | 1999-2009        | S        | Urban            | Pediatric (0-13 years) | ✓        | ✓   |    |        |   | ✓   | Retrospective cohort study          | III-3                   |
| Alghnam et al, 2014 (30)      | Saudi Arabia | 2001-2010        | S        | Urban            | No age restrictions    | ✓        | ✓   |    |        |   | ✓   | Retrospective cross-sectional study | IV                      |
| Alghnam et al, 2019 (31)      | Saudi Arabia | 2001-2018        | S        | Rural            | Pediatric (0-18 years) |          | ✓   |    |        |   | ✓   | Retrospective cross-sectional study | IV                      |
| Alkhalaf et al, 2021 (2)      | Saudi Arabia | 2015-2020        | N        | Both             | Child (0-14 years)     | ✓        | ✓   |    |        | ✓ | ✓   | Retrospective chart review          | IV                      |
| Al-Mannai et al, 2014 (32)    | Qatar        | 2010             | S        | Rural            | Child (1-4 years)      |          | ✓   |    |        | ✓ |     | Cross-sectional study               | IV                      |

|                             |              |                         |   |       |                                   |   |   |   |                                     |    |
|-----------------------------|--------------|-------------------------|---|-------|-----------------------------------|---|---|---|-------------------------------------|----|
| Al-Mofadda et al, 2001 (3)  | Saudi Arabia | 1988-1998               | S | Rural | Pediatric (1-13 years)            | ✓ |   | ✓ | Retrospective cross-sectional study | IV |
| Almuneef et al, 2021 (4)    | Saudi Arabia | 2010-2016               | S | Rural | Pediatric (0-18 years)            | ✓ |   | ✓ | Retrospective chart review          | IV |
| Al-Qurashi et al, 2019 (33) | Saudi Arabia | 2005-2015               | S | Rural | Pediatric (0-14 years)            | ✓ |   | ✓ | Retrospective cross-sectional study | IV |
| Alsaif et al, 2018 (34)     | Saudi Arabia | 1999-2015               | S | Rural | Child and adolescent (0-18 years) | ✓ |   | ✓ | Retrospective cross-sectional study | IV |
| Al-Sammak, 2020 (35)        | Iraq         | 2008-2009 and 2018-2019 | S | Rural | No age restrictions               | ✓ |   | ✓ | Retrospective cross-sectional study | IV |
| Al-Talafieh, 1999 (36)      | Jordan       | 1996-1998               | S | Both  | No age restrictions               | ✓ | ✓ | V | Retrospective cross-sectional study | IV |
| Al-Thani et al, 2018 (5)    | Qatar        | 2004-2016               | N | Both  | Child (1-4 years)                 | ✓ |   | ✓ | Retrospective cross-sectional study | IV |
| Anary et al, 2010 (37)      | Iran         | 2002-2006               | S | Rural | No age restrictions               | ✓ |   | ✓ | Retrospective cross-sectional study | IV |
| Astaraki et al, 2016 (38)   | Iran         | 2007-2014               | S | Rural | Child and adolescent (<18 years)  | ✓ |   | ✓ | A descriptive cross-sectional study | IV |
| Atallah et al, 2008 (39)    | Jordan       | 2014                    | S | Rural | No age restrictions               | ✓ | ✓ | ✓ | Retrospective cross-sectional study | IV |

|                                     |       |           |   |       |                     |   |   |   |                                                                 |       |
|-------------------------------------|-------|-----------|---|-------|---------------------|---|---|---|-----------------------------------------------------------------|-------|
| Barss et al, 2009 (40)              | UAE   | 1998-2002 | N | Both  | No age restrictions | ✓ |   | ✓ | Retrospective cross-sectional study                             | IV    |
| Barzegar et al, 2019 (41)           | Iran  | 2011-2015 | N | Both  | No age restrictions | ✓ |   | ✓ | Retrospective cross-sectional study                             | IV    |
| Bazeli et al, 2017 (42)             | Iran  | 2014-2015 | N | Both  | No age restrictions | ✓ | ✓ | ✓ | Retrospective cross-sectional study                             | IV    |
| Bener et al, 1998 (43)              | UAE   | 1995      | S | Rural | Child (0-14 years)  | ✓ |   | ✓ | Retrospective cross-sectional study                             | IV    |
| Bener et al, 2011 (44)              | Qatar | 1993-2007 | N | Both  | Child (0-18 years)  | ✓ |   | ✓ | Retrospective cross-sectional study                             | IV    |
| Bilukha et al, 2016 (45)            | Iraq  | 2010-2013 | N | Both  | No age restrictions | ✓ |   | ✓ | Retrospective cross-sectional study                             | IV    |
| Bozorgi et al, 2016 (46)            | Iran  | 2008-2013 | S | Rural | No age restrictions | ✓ |   | ✓ | Retrospective cross-sectional study                             | IV    |
| Davoudi-Kiakalayeh et al, 2011 (6)  | Iran  | 2007-2008 | S | Urban | No age restrictions | ✓ | ✓ | ✓ | Retrospective cross-sectional study                             | IV    |
| Davoudi-Kiakalayeh et al, 2012 (47) | Iran  | 2005-2009 | S | Urban | No age restrictions | ✓ |   | ✓ | Interventional design (pre- and post-intervention observations) | III-2 |
| Davoudi-Kiakalayeh et al, 2013 (7)  | Iran  | 2005-2008 | S | Urban | No age restrictions | ✓ |   | ✓ | A quasi-experimental design                                     | III-2 |

|                                     |                      |           |   |       |                                                  |   |   |   |   |                                                  |                                     |    |
|-------------------------------------|----------------------|-----------|---|-------|--------------------------------------------------|---|---|---|---|--------------------------------------------------|-------------------------------------|----|
| Davoudi-Kiakalayeh et al, 2014 (16) | Iran                 | 2005-2009 | S | Urban | No age restrictions                              | ✓ |   | ✓ |   | Register-based cohort study and household survey | III-2                               |    |
| Derakhshan et al, 2020 (48)         | Iran                 | 1990-2015 | N | Both  | No age restrictions                              | ✓ |   |   | ✓ | Retrospective cross-sectional study              | IV                                  |    |
| Elhak et al, 2009 (49)              | Egypt                | 1998-2004 | S | Rural | No age restrictions                              | ✓ |   |   | ✓ | Retrospective cross-sectional study              | IV                                  |    |
| Franklin et al, 2020 (50)           | EMR                  | 1990-2017 | M | Both  | No age restrictions                              | ✓ |   | ✓ |   | Retrospective cross-sectional study              | IV                                  |    |
| Ghodsi et al, 2020 (51)             | Iran                 | 2015-2016 | N | Both  | No age restrictions                              | ✓ |   |   | ✓ | Retrospective cross-sectional study              | IV                                  |    |
| Habeeb et al, 2020 (17)             | Saudi Arabia         | 2015      | S | Urban | Parents (no age specified <30, 30-40, >40 years) | ✓ | ✓ |   | ✓ | Cross-sectional survey analysis                  | IV                                  |    |
| Hajebi et al, 2016 (52)             | Iran                 | 2009-2012 | N | Both  | No age restrictions                              | ✓ | ✓ |   | ✓ | Retrospective descriptive study                  | IV                                  |    |
| Halawa et al, 2015 (53)             | Egypt                | 2011      | N | Both  | Child (0-18 years)                               |   |   |   | ✓ | Community-based, cross-sectional survey          | IV                                  |    |
| Hammett et al, 2007 (18)            | Afghanistan and Iraq | 2003-2005 | N | Both  | Adult (active duty service members) ages 19-40)  | ✓ |   |   | ✓ | Retrospective descriptive epidemiological study  | IV                                  |    |
| He et al, 2015 (54)                 | Pakistan             | 2010-2011 | N | Urban | No age restriction                               |   | ✓ |   | ✓ | ✓                                                | Retrospective cross-sectional study | IV |



|                             |                   |                       |   |       |                                                 |   |   |   |   |                                                  |       |
|-----------------------------|-------------------|-----------------------|---|-------|-------------------------------------------------|---|---|---|---|--------------------------------------------------|-------|
| Hijazi et al, 2007 (55)     | Saudia Arabia     | 1999-2004             | S | Urban | Child (<12 years)                               | ✓ |   |   | ✓ | Prospective observational study                  | III-3 |
| Hooshangi et al, 2020 (56)  | Iran              | 2010-2015             | S | Urban | Child (< 5 years)                               | ✓ |   |   | ✓ | Cross-sectional secondary alysis of data         | IV    |
| Jan et al, 2013 (8)         | Saudi Arabia      | 1999-2000             | S | Urban | Parents of infants (infant mean age 4.7 months) | ✓ | ✓ | ✓ |   | Interviews using a semi-structured questionnaire | IV    |
| Khalil et al, 2013 (57)     | Pakistan          | 2009-2012             | S | Urban | No age restrictions                             | ✓ |   |   | ✓ | Retrospective cross-sectional study              | IV    |
| Khzaei et al, 2020 (58)     | Iran              | 2009-2015             | S | Urban | Child (1-5 years)                               |   |   | ✓ | ✓ | Retrospective cross-sectional study              | IV    |
| Kiakalayeh et al, 2008 (19) | Iran              | 2005-2006             | S | Both  | No age restrictions                             | ✓ |   | ✓ |   | Retrospective, population-based study            | III-3 |
| Kiakalayeh et al, 2011 (59) | Iran              | 2005-2006             | S | Both  | No age restrictions                             | ✓ |   | ✓ | ✓ | Retrospective cross-sectional study              | IV    |
| Lin et al, 2019 (60)        | Egypt and Morocco | 2004-2005 & 2014-2015 | M | Both  | No age restrictions                             | ✓ |   | ✓ |   | Retrospective, total population study            | IV    |
| Liu et al, 2021 (9)         | Bahrain           | 2018 (Sept-Dec)       | N | Both  | Child (<14 years)                               | ✓ | ✓ |   | ✓ | Multicentre observational cross-sectional study  | IV    |
| Malik, 1975 (61)            | Sudan             | 1970                  | N | Both  | No age restrictions                             | ✓ |   | ✓ | ✓ | Retrospective cross-sectional study              | IV    |

|                           |                                    |               |   |       |                           |   |   |     |                                       |    |
|---------------------------|------------------------------------|---------------|---|-------|---------------------------|---|---|-----|---------------------------------------|----|
| Mal et al, 2020 (20)      | Pakistan                           | 2013-2018     | S | Both  | No age restrictions       | ✓ |   | ✓   | Descriptive cross-sectional study     | IV |
| Mavridou et al, 2014 (21) | Lebanon, Palestine, Egypt, Tunisia | Not specified | M | Both  | No age restrictions       |   | ✓ | ✓   | Cross-sectional survey                | IV |
| Mlayeh et al, 2021 (22)   | Tunisia                            | 2008-2015     | S | Rural | No age restrictions       | ✓ |   | ✓ ✓ | Retrospective cross-sectional study   | IV |
| Mokdad et al, 2018 (62)   | EMR                                | 1990-2015     | M | Both  | Adolescents (10-24 years) | ✓ | ✓ | ✓   | Retrospective, total population study | IV |
| Mosayebi et al, 2011 (10) | Iran                               | 1995-2005     | S | Both  | Child (0-17 years)        | ✓ | ✓ | ✓   | Retrospective cross-sectional study   | IV |
| Naghavi et al, 2010 (63)  | Iran                               | 2005          | N | Both  | Child (0-14 years)        | ✓ | ✓ | ✓   | Retrospective cross-sectional study   | IV |
| Pal et al, 2018 (64)      | Pakistan                           | 2007-2016     | S | Urban | No age restrictions       | ✓ |   | ✓   | Retrospective cross-sectional study   | IV |
| Razzak et al, 2013 (23)   | Pakistan                           | 2006-2007     | N | Both  | Child (<5 years)          | ✓ |   | ✓   | Retrospective cross-sectional study   | IV |
| Razzak et al, 2004 (65)   | Pakistan                           | 1993-1996     | S | Rural | Child (≤15 years)         | ✓ | ✓ | ✓   | Retrospective, descriptive study      | IV |
| Roudsari et al, 2006 (66) | Iran                               | 1999-2000     | S | Both  | Child (0-15 years)        | ✓ |   | ✓   | Retrospective cross-sectional study   | IV |
| Ruehsen et al, 1989 (24)  | Bahrain                            | 1984-1985     | S | Both  | No age restrictions       |   | ✓ | ✓   | Retrospective cross-sectional study   | IV |

|                                |                       |                          |   |            |                                   |   |   |   |   |                                     |    |
|--------------------------------|-----------------------|--------------------------|---|------------|-----------------------------------|---|---|---|---|-------------------------------------|----|
| Samaneh et al, 2012 (67)       | Iran                  | 2008-2009                | S | Urban      | No age restrictions               | ✓ |   | ✓ | ✓ | Retrospective cross-sectional study | IV |
| Shahbazi et al, 2020 (11)      | Iran                  | 2013-2018                | N | Both       | No age restrictions               | ✓ |   |   | ✓ | Descriptive, cross-sectional study  | IV |
| Shaheen and Edwards, 2008 (25) | Palestinian Territory | 2001-2003                | N | Both       | Child (0-19 years)                | ✓ |   | ✓ | ✓ | Retrospective cross-sectional study | IV |
| Shaikh, 2014 (26)              | Pakistan              | Not specified            | S | Urban      | No age restrictions               | ✓ | ✓ |   | ✓ | Cross-sectional survey              | IV |
| Shaikh, 2016 (27)              | Pakistan              | 2012-2014                | S | Rural      | No age restrictions               | ✓ | ✓ |   | ✓ | Retrospective cross-sectional study | IV |
| Sheikhazadi et al, 2009 (68)   | Iran                  | 2002-2006                | S | Rural      | No age restrictions               | ✓ |   | ✓ | ✓ | Retrospective cross-sectional study | IV |
| Siddiqui et al, 2012 (69)      | Pakistan              | 2005-2007                | S | Semi-rural | Child (0-14 years)                |   | ✓ | ✓ |   | Retrospective descriptive study     | IV |
| Soori et al, 1999 (70)         | Iran                  | 1993-1994                | N | Rural      | No age restrictions               | ✓ |   | ✓ |   | Retrospective cross-sectional study | IV |
| Soori et al, 2016 (71)         | EMR                   | 2004                     | N | Both       | Child (< 20 years)                | ✓ |   | ✓ |   | Secondary analysis of data          | IV |
| Vahhab et al, 2019 (12)        | Iran                  | 2011-2016                | S | Urban      | Child and adolescent (0-18 years) | ✓ |   | ✓ | ✓ | Retrospective cross-sectional study | IV |
| Waseem et al, 2011 (72)        | Pakistan              | 6 months (not specified) | S | Both       | No age restrictions               |   |   | ✓ | ✓ | Retrospective case review           | IV |

|                            |      |           |   |      |                        |   |   |   |                                         |    |
|----------------------------|------|-----------|---|------|------------------------|---|---|---|-----------------------------------------|----|
| Zolala et al,<br>2012 (13) | Iran | 2007-2011 | S | Both | No age<br>restrictions | ✓ | ✓ | ✓ | Retrospective cross-<br>sectional study | IV |
|----------------------------|------|-----------|---|------|------------------------|---|---|---|-----------------------------------------|----|

NHMRC – National Health and Medical Research Council; UAE – United Arab Emirates; EMR-Eastern Mediterranean Region; M-Multi-national, N-National, S-Subnational, F-Fatal, N-F- Non-Fatal, U-Unspecified, Un-Unintentional, I-Intentional, U-Unspecified

## References

1. Al-Fifi S, Shabana M, Zayed M, Al-Binali A, Al-Shehri M. Drowning in children: Aseer Central Hospital experience, Southwestern Saudi Arabia. *Journal of Family and Community Medicine* 2011;18(1):13-6.
2. Alkhalaf H, Zuraie M, Alqahtani Ryan N, Alghamdi M, Afif Abdulrahman B, Alqahtani Faisal J, et al. The epidemiology of drowning among Saudi children: results from a large trauma center. *Ann Saudi Med*. 2021;41(3):157-64.
3. Al-Mofadda SM, Nassar A, Al-Turki A, Al-Sallounm AA. Pediatric Near Drowning: The Experience of King Khalid University Hospital. 2001;21(5-6):300-3.
4. Almuneef M, Saleheen H, AlBuhairan F, Al-Eissa M, Al Muntaser M, Al Alem H, et al. Child mortality in Saudi Arabia: Time for action at all levels. *Int J Pediatr Adolesc Med*. 2021;8(3):165-71.
5. Al-Thani M, Al-Thani A-A, Toumi A, Khalifa S, Ijaz MA, Akram H. Trends in the leading causes of childhood mortality from 2004 to 2016 in Qatar. *Central Asian journal of global health*. 2018;7(1):334-.
6. Davoudi-Kiakalayeh A, Dalal K, Yousefzade-Chabok S, Jansson B, Mohammadi R. Costs related to drowning and near drowning in northern Iran (Guilan province). *Ocean and Coastal Management*. 2011;54(3):250-5.
7. Davoudi-kiakalayeh A, Mohammadi R, Yousefzade-Chabok S, Jansson B. Evaluation of a community-based drowning prevention programme in northern Islamic Republic of Iran. *East Mediterr Health J*. 2013;19(7):629-37.
8. Jan MM. Pediatric near-drowning and drowning. *Saudi Med J*. 2013;34(2):119-22.
9. Liu JC, Ismael AA, Zaidi A, Sha'ban BW, Almutawa SE, Chatha AA, et al. Epidemiology of pediatric trauma in the Kingdom of Bahrain: a national pediatric trauma registry pilot study. *Injury Epidemiology*. 2021;8(1):42.
10. Mosayebi Z, Movahedian A, Mousavi G. Drowning in children in Iran: outcomes and prognostic factors. *Med J Malaysia*. 2011;66(3):187-90.
11. Shahbazi F, Mirtorabi SD, Mahdavi SAH, Nazari SSH. Trend of mortality rate due to drowning in Iran (2013-2018). *ARCHIVES OF TRAUMA RESEARCH*. 2020;9(3):111-5.
12. Vahhab E, Gholamzadeh S, Zarenezhad M. Injury-related pediatric mortality in Shiraz, Iran: A community-based survey. *Shiraz E Med J*. 2019;20(2).
13. Zolala F, Nasehi MM, Moosazadeh M, Azadeh H, Mirzajani M. Epidemiology of drowning in Mazandaran, Iran: a population based study. *Middle-East J Sci Res*. 2012;11.
14. Abdullah S, Sharkas G, Sabri N, Iblan I, Abdallat M, Jriesat S, et al. Mass gathering in Aqaba, Jordan, during Eid Al Adha, 2010. *East Mediterr Health J*. 2013;19.
15. Al Awadhi MA, Abulfateh NM, Board A. Drowning Epidemiology in Bahrain (2003-2015). *Bahrain Med Bull*. 2018;40(1).
16. Davoudi-Kiakalayeh A, Mohammadi R, Yousefzade-Chabok S. Maternal Beliefs and Socioeconomic Correlated Factors on Child Mortality from Drowning in Caspian Sea Coastline. *Bull Emerg Trauma*. 2014;2(2):86-91.
17. Habeeb KA, Alarfaj G. Saudi parents awareness regarding burn, choking, and drowning first aid in children. *Journal of Family Medicine and Primary Care*. 2020;9(3).
18. Hammett M, Pearse L, Naito N, Watts D, Hooper T. Drowning Deaths of U.S. Service Personnel Associated with Motor Vehicle Accidents Occurring in Operation Iraqi Freedom and Operation Enduring Freedom, 2003–2005. *Military Medicine*. 2007;172(8):875-8.
19. Kialalayeh AD, Mohammadi R, Ekman DS, Chabok SY, Janson B. Unintentional drowning in northern Iran: A population-based study. *Accident Analysis and Prevention*. 2008;40(6):1977-81.
20. MAL S, TIRMIZI SZA, WASEEM F, MAKHDOOM PA, IMRAN S, MIRZA FH, et al. Medicolegal Analysis of Fatal Drowning in Karachi: An Autopsy Based Study. *PAKISTAN JOURNAL OF MEDICAL & HEALTH SCIENCES*. 2020;14(4):1212-5.

21. Mavridou A, Pappa O, Papatzitze O, Blougoura A, Drossos P. An overview of pool and spa regulations in Mediterranean countries with a focus on the tourist industry. *Journal of Water and Health*. 2014;12(3):359-71.
22. Mlayeh S, Ben Abderrahim S, Haggui F, Ghzel R, Jedidi M. Deadly falls into wells: A retrospective study of 72 autopsy cases from Kairouan, Tunisia. *Journal of Forensic Sciences*. 2021;66(3):934-9.
23. Razzak JA, Khan UR, Zia N, Azam I. A child an hour: burden of injury deaths among children under 5 in Pakistan. *Archives of Disease in Childhood*. 2013;98(11):867.
24. Ruehsen MM, Abdul-Wahab A-WM. The Epidemiology of Trauma in an Intensive Care Unit in Bahrain. *Journal of Trauma and Acute Care Surgery*. 1989;29(1).
25. Shaheen A, Edwards P. Flying bullets and speeding cars: analysis of child injury deaths in the Palestinian Territory. *East Mediterr Health J*. 2008;14(2):406-14.
26. Shaikh MA. Risks of drowning and safety concerns at the beaches of Karachi--perspective from lifeguards. *The Journal of the Pakistan Medical Association*. 2014;64(5):576-8.
27. Shaikh MA. Epidemiology of drowning and near drowning at Karachi beaches from 2012 to 2014. *The Journal of the Pakistan Medical Association*. 2016;66(5):602-5.
28. Aghajani MH, Haddadi M, Saadat S. Epidemiological pattern of injuries in iran; A nationwide review of seven million emergency department admissions. *Arc Acad Emer Med*. 2019;7(1).
29. Aghamohamadi S, Jahangiri K, Kavousi A, Sayah Mofazali A. Analysis and Forecasting the Accident Mortality Trends in the Islamic Republic of Iran Applying Lee-Carter Model During the Years 2006 to 2035. *Bulletin of emergency and trauma*. 2018;6(4):341-8.
30. Alghnam S, Alkelya M, Al-Bedah K, Al-Enazi S. Burden of traumatic injuries in Saudi Arabia: lessons from a major trauma registry in Riyadh, Saudi Arabia. *Ann Saudi Med*. 2014;34(4):291-6.
31. Alghnam S, Towhari JA, Al Babtain I, Al Nahdi M, Aldebasi MH, Alyami M, et al. The associations between injury mechanism and extended hospital stay among pediatric patients: findings from a trauma Center in Saudi Arabia. *BMC Pediatrics*. 2019;19(1):177.
32. Al-Mannai L, Selim NAA, Al-kuwari MG, Ismail MFS. Unintentional injuries among preschool children in Qatar: Cross sectional study. *World Family Medicine Journal*. 2014;12(1):36-44.
33. Al-Qurashi FO, Yousef AA, Aljoudi A, Alzahrani SM, Al-Jawder NY, Al-Ahmar AK, et al. A Review of Nonfatal Drowning in the Pediatric-Age Group: A 10-Year Experience at a University Hospital in Saudi Arabia. *Pediatric Emergency Care*. 2019;35(11).
34. Alsaif DM, Almadani OM, Ali Almoghannam S, Hamdi D, Al-Farayedhi MA, Kharosha MA. Child Fatalities in Dammam: A Call for Child Fatality Reviews in Arab Countries. *Journal of Forensic Sciences*. 2018;63(4):1171-5.
35. Al-Sammak NI. Types of Accidents in Nineveh Governorate/Iraq. *International Journal of Psychosocial Rehabilitation*. 2020;24(05).
36. Al Talafieh A, Al Majali R, Al Dehayat G. Clinical, laboratory and X-ray findings of drowning and near-drowning in the Gulf of Aqaba. *East Mediterr Health J*. 1999;5(4):706-9.
37. Anary SHS, Sheikhezadi A, Ghadyani MH. Epidemiology of Drowning in Mazandaran Province, North of Iran. *AMERICAN JOURNAL OF FORENSIC MEDICINE AND PATHOLOGY*. 2010;31(3):236-42.
38. Astaraki P, Mahmoudi G, Ahadi M, Almasi V. The reasons of death among children and adolescents in Lorestan Province, west of Iran, from 2007 to 2014. *International Journal of Medical Toxicology and Forensic Medicine*. 2016;6(2):65-70.
39. Atallah AI. Epidemiology of trauma injuries in the districts of Amman, Jordan: problems and suggestions. *JEMTAC - Journal of Emergency Medicine, Trauma and Acute Care* 2008;8(1):35-7.
40. Barss P, Subait OM, Ali MHA, Grivna M. Drowning in a high-income developing country in the Middle East: Newspapers as an essential resource for injury surveillance. *Journal of Science and Medicine in Sport*. 2009;12(1):164-70.

41. Barzegar A, Ghadipasha M, Aram S, Khademi A. Suicides, homicides, and fatal occupational accidents in Iran: A cross-sectional, retrospective study based on autopsy reports; need to develop preventive strategies. *Iranian Red Crescent Medical Journal*. 2019;21(4):e65672.
42. Bazeli J, Aryankhesal A, Khorasani-Zavareh D. Epidemiology of special incidents: Results from national mortality and morbidity registry and the associated factors in Iran in 2014. *Electronic physician*. 2017;9(8):5113-21.
43. Bener A, Al-Salman KM, Pugh RNH. Injury mortality and morbidity among children in the United Arab Emirates. *Eur J Epidemiol*. 1998;14(2):175-8.
44. Bener A, Hussain SJ, Ghaffar A, Abou-Taleb H, El-Sayed HF. Trends in childhood trauma mortality in the fast economically developing State of Qatar. *World J Pediatrics*. 2011;7(1):41-4.
45. Bilukha OO, Sultan ASS, Hassan A, Hussain SJ, Leidman E. Injury-related fatalities in selected governorates of Iraq from 2010 to 2013: Prospective surveillance. *Am J Disaster Med*. 2016;11(1):49-58.
46. Bozorgi F, Derakhshanfar H, Hoseininejad SM, Abbasi A, AbolghasemLali MT. Cogitation on Routine Drowned Cases in Mazandaran Province: a CaseStudyinbetweentheYear2008to2013. *Ambient Science*. 2016;3(2):61-3.
47. Davoudi-Kiakalayeh A, Mohammadi R, Yousefzadeh-Chabok S. Prevention of Drowning by Community-Based Intervention: Implications for Low- and Middle-Income Countries. *ARCHIVES OF TRAUMA RESEARCH*. 2012;1(3):112-7.
48. Derakhshan P, Saeedi Moghaddam S, Saadat S, Ghanbari A, Rezaei N, Khosravi S, et al. Trends in the drowning mortality rate in Iran. *Injury Prevention*. 2020;26(4):351-9.
49. Gad ElHak SA, El-Ghazali AM, Salama MM, Aboelyazeed AY. Fatal suicide cases in Port Said city, Egypt. *Journal of Forensic and Legal Medicine*. 2009;16(5):266-8.
50. Franklin RC, Peden AE, Hamilton EB, Bisignano C, Castle CD, Dingels ZV, et al. The burden of unintentional drowning: global, regional and national estimates of mortality from the Global Burden of Disease 2017 Study. *Injury Prevention*. 2020;26(Supp 1):i83-i95.
51. Ghodsi Z, Saadat S, Barzegar A, Alaeddini F, Rahimi-Movaghar V, Zafarghandi M, et al. The completeness of the registration system and the economic burden of fatal injuries in Iran. *Turkish Journal of Trauma and Emergency Surgery*. 2020;26(5):671-7.
52. Hajebi A, Ahmadzad-Asl M, Davoudi F, Ghayyomi R. Trend of suicide in Iran during 2009 to 2012: Epidemiological evidences from national suicide registration. *Iran J Psychiatr Behav Sci*. 2016;10(4).
53. Halawa EF, Barakat A, Rizk HII, Moawad EMI. Epidemiology of non-fatal injuries among Egyptian children: a community-based cross-sectional survey. *BMC Public Health*. 2015;15(1):1248.
54. He S, Lunnen JC, Zia N, Khan UR, Shamim K, Hyder AA. Pattern of presenting complaints recorded as near-drowning events in emergency departments: a national surveillance study from Pakistan. *BMC Emergency Medicine*. 2015;15(2):S4.
55. Hijazi OM, Shahin AA, Haidar NA, Sarwi MF, Musawa ES. Effect of submersion injury on water safety practice after the event in children, Saudi Arabia. *Saudi Med J*. 2007;28(1):100.
56. Hooshangi Z, Salehi S, Amini-Rarani M. Explanatory social variables of under-5 mortality caused by injury in Isfahan Province, Islamic Republic of Iran. *East Mediterr Health J*. 2020;26(6):660-7.
57. Khalil ZH, Naeem M, Adil M, Khan MZ-u-I, Abbas SH. Analysis of autopsy record of unnatural deaths in Peshawar district. *J Postgrad Med Inst*. 2013;27(4).
58. Khazaei S, Ayubi E, Sanaei Z, Jenabi E, Khazaei L, Amiri J. Epidemiologic characteristics of injuries among 1-5 year-old children in Hamadan Province: Analysis of 4523 hospitalized children over a 6-year period. *Archives of Trauma Research*. 2020;9(1):3-7.
59. Kialalayeh AD, Mohammadi R, Ekman DS, Yousefzade-Chabok S, Behboudi F, Jansson B. Estimating drowning deaths in Northern Iran using capture-recapture method. *Health Policy*. 2011;100(2-3):290-6.

60. Lin C-Y, Wang L-Y, Lu T-H. Changes in drowning mortality rates and quality of reporting from 2004–2005 to 2014–2015: a comparative study of 61 countries. *BMC Public Health*. 2019;19(1):1391.
61. Malik MOA. Some Aspects of the Mortality Pattern in the Sudan. *Med Sci Law*. 1975;15(4):246-60.
62. Azzopardi P, Cini K, Kennedy E, Sawyer S, El Bcheraoui C, Charara R, et al. Adolescent health in the Eastern Mediterranean Region: findings from the global burden of disease 2015 study. *International Journal of Public Health*. 2018;63(1):79-96.
63. Naghavi M, Pourmalek F, Shahrzad S, Jafari N, Delavar B, Motlagh ME. The burden of injuries in Iranian children in 2005. *Popul Health Metr*. 2010;8(1):5.
64. Pal MI, Qasim AP, Naeem M, Arshad H, Saeed A. Profile of Asphyxial Deaths in Faisalabad: A 10-Year Study. *J Coll Phys Surg Pak*. 2018;28:266+.
65. Razzak JA, Luby SP, Laflamme L, Chotani H. Injuries among children in Karachi, Pakistan—what, where and how. *Public Health*. 2004;118(2):114-20.
66. Roudsari BS, Shadman M, Ghodsi M. Childhood trauma fatality and resource allocation in injury control programs in a developing country. *BMC Public Health*. 2006;6(1):117.
67. Samaneh A, Samaneh A, Hamid S, Ardeshir K, Khosro G. Years of potential life lost due to unintentional drowning mortality in Mazandaran province, Iran. *World Appl Sci J*. 2012;20(10):1433-8.
68. Sheikhezadi A, Ghadyani MH. Epidemiology of drowning in Isfahan province, center of Iran. *J Res Med Sci*. 2009;14(2):79-87.
69. Siddiqui E, Ejaz K, Siddiqui U. Unintentional, paediatric domestic injury in a semi rural area of Karachi. *Journal of Pakistan medical association*. 2012;62(7):638.
70. Soori H, Naghavi M. Deaths from unintentional injuries in rural areas of the Islamic Republic of Iran. *East Mediterr Health J*. 1999;5(1):55-60.
71. Soori H, Khodakarim S. Child unintentional injury prevention in Eastern Mediterranean Region. *International Journal of Critical Illness and Injury Science*. 2016;6(1):33-9.
72. Waseem H, Careno L, Razzak J, Naseer R. Epidemiology of major incidents: an EMS study from Pakistan. *Int J Emer Med*. 2011;4(1):48.
